# Supplementary material
Source: publisher figshare collection journal article supplement (https://tandf.figshare.com/ndownloader/files/13607120)
Supplement: Supplementary file 1 [file 13607120]

**Supplementary Materials for**

**Ductility by shear band delocalization in the nano-layer of gradient structure**

Fuping Yuana,b, Dingshun Yana, JiangDa. Suna, Lingling Zhou a, Yuntian. Zhuc,d*,and Xiaolei Wua,b*

*aState Key Laboratory of Nonlinear Mechanics,*

*Institute of Mechanics, Chinese Academy of Science,*

*15 Beisihuan West Road, Beijing 100190, China*

*bSchool of Engineering Science, University of Chinese Academy of Sciences,*

*19A Yuquan road, Beijing 100049, China*

*cNano Structural Materials Center, School of Materials Science and Engineering,*

*Nanjing University of Science and Technology,*

*200 Xiaolingwei, Nanjing 210094, China*

*dDepartment of Materials Science and Engineering, North Carolina State University,*

*Campus Box 7919, Raleigh, NC 27695, USA*

**Digital image correlation imaging**

The digital image correlation (DIC) imaging was attached to provide a large optical field-of-view with representative statistics on the top NS surface of GS samples. The DIC tensile tests were also conducted in CG samples for comparison. The specific commercial VIC-2D software was utilized for DIC data analysis and strain-field calculation. The longitudinal (axial) strains () in the gauge section were recorded continuously with increasing applied tensile strain (). The localized strain rate () was also calculated in terms of . Also, the interrupted DIC tensile tests were conducted for the microstructural observations, texture analysis, and Vickers micro-hardness (Hv) measurements in the NS surface layer.


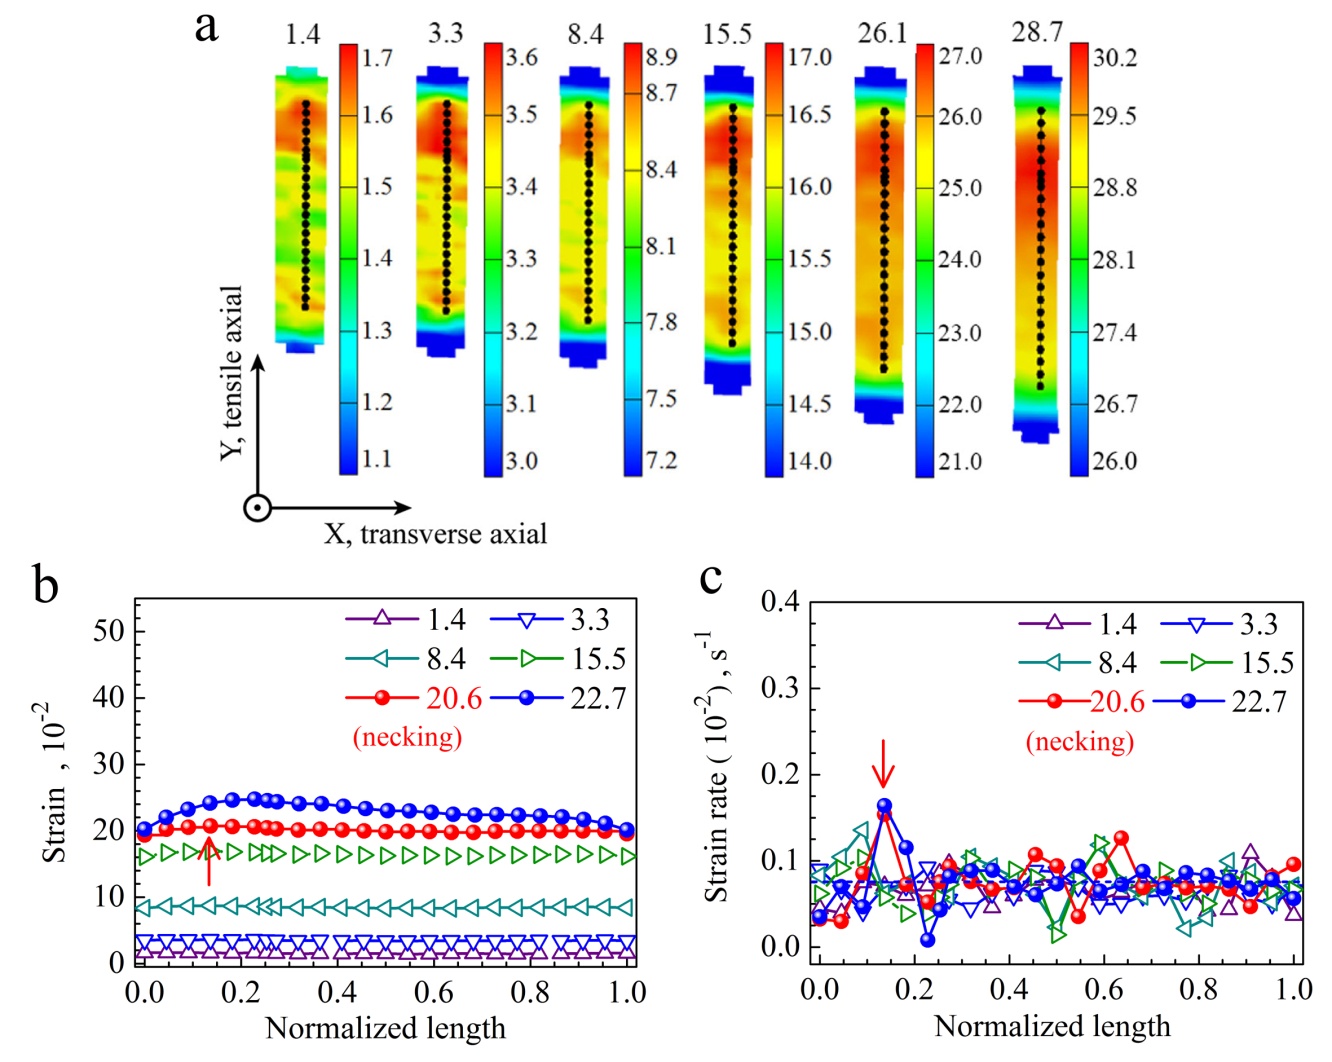


Fig. S1 Tensile deformation in homogeneous CG sample. (a) Longitudinal strain () contour maps at varying applied strains (). Number above each contour: , %. Scale bar: the range of inside each contour. Two numbers at both ends: maximum and minimum of . (b) and (c) Distribution of both and . Horizontal dashed line in (C) applied strain rate of 8×10-4 s-1.

During uniform tensile deformation, is almost uniform, even more or less waved (Fig. 2d), and equal to everywhere along the line in the gauge section. is also uniform, equal to . Upon diffused necking at EU of 26% (➁ in Fig. 2b), rises moderately (indicated by an arrow in Fig. 2b) at the place where the neck is (arrow in Fig. 2b), but with an evident rise of .
